# Supplementary material
Source: PubMed Central journal article supplement (PMC10431345)
Supplement: as9-4-e270-s001.pdf [file as9-4-e270-s001.pdf]

# Supplemental Digital Content for Geographic Disparities in Re-triage Destinations Among Seriously Injured Californians

Al'ona Furmanchuk,<sup>a,b\*</sup> PhD, (alona.furmanchuk@northwestern.edu )

Kelsey James Rydland,<sup>c</sup> PhD, (Kelsey.rydland@northwestern.edu)

Renee Y. Hsia<sup>d,e</sup>, MD, (renee.hsia@ucsf.edu)

Robert Mackersie,<sup>f</sup> MD, FACS (robert.mackersie@ucsf.edu)

Meilynn Shi,<sup>a</sup> BS (Meilynn.shi@northwestern.edu)

Mark William Hauser,<sup>g</sup> PhD, (mark.hauser@northwestern.edu)

Abel Kho,<sup>a,b</sup> MD, MS, FACMI (akho@nm.org)

Karl Y. Bilimoria,<sup>h</sup> MD, MS, FACS (karl.bilimoria@northwestern.edu)

Anne M. Stey,<sup>h</sup> MD, MSc, FACS (anne.stey@northwestern.edu)

<sup>a</sup> Northwestern University Feinberg School of Medicine, Division of General Internal Medicine and Geriatrics, Chicago, IL;

<sup>b</sup> Center for Health Information Partnerships (CHiP), Institute for Public Health and Medicine, Northwestern University Feinberg School of Medicine, Chicago, IL, USA, Chicago, IL;

<sup>c</sup> Northwestern University Libraries, Research and Data Services, Evanston, IL;

<sup>d</sup> University of California San Francisco, Department of Emergency Medicine, San Francisco, CA;

<sup>e</sup> Philip R. Lee Institute for Health Policy Studies, University of California San Francisco, San Francisco, CA

<sup>f</sup> University of California San Francisco, Department of Surgery, San Francisco, CA;

<sup>g</sup> Northwestern University, Department of Anthropology, Evanston, IL;

<sup>h</sup> Northwestern University Feinberg School of Medicine, Department of Surgery, Chicago, IL

## Content

**Supplemental Digital Content 1. Table 1.** illustrates data management is used to produce a universe of relevant re-triages and sub-optimal re-triages.

**Supplemental Digital Content 2. Table 2.** illustrates annual counts of re-triages and under-triages in the California Department of Healthcare Access and Information (HCAI) ED and inpatient discharge datasets. Re-triages are identified according to the direction: from ED department of sending facility to the inpatient settings of receiving facility (ED-to-PDD) and between ED departments of different facilities (ED-to-ED).

**Supplemental Digital Content 3. Table 3.** illustrates re-triages by Sending Center LEMSA of Seriously Injured Patients in California from 2009-2018.

**Supplemental Digital Content 4. Figure 1.** illustrates annual sub-optimal re-triages of Seriously Injured Patient in California from 2009-2019 in each local emergency medical services agencies (LEMSA) segregated by regional trauma coordination center (RTCC)

**Supplemental Digital Content 5. Table 4.** illustrates capacity and demand of trauma care by RTCC.

**Supplemental Digital Content 6. Table 5.** illustrates the length of stay and discharge disposition in receiving center from sub-optimal versus optimal re-triaged seriously injured patients in California 2009-2018.

**Supplemental Digital Content 6. Table 6.** illustrates unadjusted rates of discharge disposition from sub-optimal versus optimal re-triaged seriously injured patients in California 2009-2018.

**Supplemental Digital Content 6. Table 7.** illustrates the odds ratio estimated (using logistic regression) for expected discharge disposition outcome after sub-optimally re-triaged versus optimally re-triaged patients

**Supplemental Digital Content 6. Table 8.** illustrates value sets used to group discharge disposition (disp) variable into categories.

**Supplementary Digital Content 7. Table 9.** Illustrates re-admission after discharge from sub-optimal versus optimal re-triage destination among seriously injured patients in California 2009-2018.

**Supplementary Digital Content 7. Table 10.** illustrates the odds ratio estimated (using logistic regression) for re-admission after discharge from sub-optimal versus optimal re-triage destination among seriously injured patients in California 2009-2018.

**Supplementary Digital Content 8. Table 11.** illustrates an annual summary on severely injured patients listed as transferred but not subsequently found in a second hospital.

**Supplemental Digital Content 1. Table 1.** Data management is used to produce a universe of relevant re-triages and sub-optimal re-triages.

| <b>Data management</b>                                           | <b>Step</b> | <b>Processing logic</b>                                                                                                                                                                                                                                                                                                                                                                                                                                                                                                                                                                                              | <b>Total records</b>            |
|------------------------------------------------------------------|-------------|----------------------------------------------------------------------------------------------------------------------------------------------------------------------------------------------------------------------------------------------------------------------------------------------------------------------------------------------------------------------------------------------------------------------------------------------------------------------------------------------------------------------------------------------------------------------------------------------------------------------|---------------------------------|
| Pre-processing                                                   | 1           | Records from period 2009-2018 were collected                                                                                                                                                                                                                                                                                                                                                                                                                                                                                                                                                                         | ED: 41224883<br>IP: 7,439,260   |
|                                                                  | 2           | Unique records produced using all fields available                                                                                                                                                                                                                                                                                                                                                                                                                                                                                                                                                                   | ED: 24,592,353<br>IP: 4,036,917 |
| Relevant ED record collection or starting point of the re-triage | 3           | ED records for patient of age 18-89 years old having valid record linkage number available<br><b>AND</b> RISS>15<br><b>AND</b> presented to a non-trauma or level III/IV trauma centers with injury diagnosis defined by the ICD-9: 800-904.9, 910-939.0, and 950-959.9 or ICD-10: S00-T19, T33-T34, T79 codes<br><b>AND</b> discharge dispositions not 'Expired', 'Left against medical advice or discontinued care', or 'Discharged/Transferred to an Inpatient Rehabilitation Facility (IRF) including Rehabilitation Distinct Part Unit of a Hospital with a Planned Acute Care Hospital Inpatient Readmission'. | 55,222                          |
| Denominator or universe of all relevant re-triages               | 4           | Records after ED discharges where linked (using record linkage number) to inpatient admission record except for Emergency or Elective type inpatient admissions. Admissions up to 1 day after discharge were considered.                                                                                                                                                                                                                                                                                                                                                                                             | 8,882                           |
| Numerator or sub-optimal re-triages                              | 5           | Records with inpatient destination being level III/IV trauma and non-trauma centers.                                                                                                                                                                                                                                                                                                                                                                                                                                                                                                                                 | 2,680                           |

**Supplemental Digital Content 2. Table 2.** Annual counts of re-triages and under-triages in the California Department of Healthcare Access and Information (HCAI) ED and inpatient discharge datasets. Re-triages are identified according to the direction: from ED department of sending facility to the inpatient settings of receiving facility (ED-to-PDD) and between ED departments of different facilities (ED-to-ED).

| Triage direction      | Year |      |      |      |      |      |      |      |      |      |      |      |      |      |
|-----------------------|------|------|------|------|------|------|------|------|------|------|------|------|------|------|
|                       | 2005 | 2006 | 2007 | 2008 | 2009 | 2010 | 2011 | 2012 | 2013 | 2014 | 2015 | 2016 | 2017 | 2018 |
| Total re-triages*:    | 226  | 487  | 518  | 653  | 698  | 640  | 896  | 838  | 1002 | 899  | 1003 | 1062 | 1307 | 1209 |
| ED-to-PDD             | 218  | 464  | 486  | 618  | 669  | 609  | 856  | 804  | 959  | 830  | 935  | 954  | 1183 | 1083 |
| ED-to-ED              | 8    | 23   | 32   | 35   | 29   | 31   | 40   | 34   | 43   | 69   | 68   | 108  | 124  | 126  |
| Total under-triages** | 2474 | 2540 | 2924 | 2795 | 3025 | 2990 | 2853 | 3027 | 3243 | 3264 | 3509 | 5257 | 3373 | 3643 |
| Total triages         | 2692 | 3004 | 3410 | 3413 | 3694 | 3599 | 3709 | 3831 | 4202 | 4094 | 4444 | 6211 | 4556 | 4726 |

\*Re-triage was defined as a patient with a RISS>15 who first visited a non-trauma or Level I/II trauma center, but was subsequently taken to another center.

\*\*Under-triage was defined as any patient with an ISS>15 who was never taken to a Level I/II trauma center.

The under-triaged patients are patients that were never re-triaged from the original non-trauma or level III/IV trauma center.

**Supplemental Digital Content 3. Table 3.** Re-triages by Sending Center LEMSA of Seriously Injured Patients in California from 2009-2018.

| Sending center location by LEMSA | Re-triages<br>N=8,882 (%) | Sub-optimal<br>re-triages<br>N=2,680 (%) | Optimal<br>re-triages<br>N=6,202 (%) |
|----------------------------------|---------------------------|------------------------------------------|--------------------------------------|
| <b>North Region</b>              |                           |                                          |                                      |
| Coastal Valleys                  | 385 (4.3)                 | 51 (1.9)                                 | 334 (5.4)                            |
| El Dorado County                 | 40 (0.5)                  | 15 (0.6)                                 | 25 (0.4)                             |
| Napa County                      | 63 (0.7)                  | 8 (0.3)                                  | 55 (0.9)                             |
| NorCal                           | 30 (0.3)                  | 0 (0)                                    | 30 (0.5)                             |
| North Coast                      | 292 (3.3)                 | 44 (1.6)                                 | 248 (4)                              |
| Sacramento County                | 113 (1.3)                 | 24 (0.9)                                 | 89 (1.4)                             |
| San Joaquin County               | 352 (4)                   | 139 (5.2)                                | 213 (3.4)                            |
| Sierra-Sacramento                | 570 (6.4)                 | 113 (4.2)                                | 457 (7.4)                            |
| Yolo County                      | 37 (0.4)                  | 20 (0.7)                                 | 17 (0.3)                             |
| <b>Bay Area Region</b>           |                           |                                          |                                      |
| Alameda County                   | 471 (5.3)                 | 201 (7.5)                                | 270 (4.4)                            |
| Contra Costa County              | 475 (5.3)                 | 89 (3.3)                                 | 386 (6.2)                            |
| Marin County                     | 59 (0.7)                  | 55 (2.1)                                 | 4 (0.1)                              |
| Monterey County                  | 47 (0.5)                  | 15 (0.6)                                 | 32 (0.5)                             |
| San Benito County                | 36 (0.4)                  | 6 (0.2)                                  | 30 (0.5)                             |
| Santa Clara County               | 127 (1.4)                 | 63 (2.4)                                 | 64 (1)                               |
| Santa Cruz County                | 33 (0.4)                  | 9 (0.3)                                  | 24 (0.4)                             |
| San Francisco County             | 108 (1.2)                 | 65 (2.4)                                 | 43 (0.7)                             |
| San Mateo County                 | 51 (0.6)                  | 44 (1.6)                                 | 7 (0.1)                              |
| Solano County                    | 192 (2.2)                 | 53 (2)                                   | 139 (2.2)                            |
| <b>Central Region</b>            |                           |                                          |                                      |
| Central California               | 1006 (11.3)               | 31 (1.2)                                 | 975 (15.7)                           |
| Kern County                      | 199 (2.2)                 | 113 (4.2)                                | 86 (1.4)                             |
| Merced County                    | 175 (2)                   | 2 (0.1)                                  | 173 (2.8)                            |
| Mountain Valley                  | 273 (3.1)                 | 36 (1.3)                                 | 237 (3.8)                            |
| Tuolumne County                  | 161 (1.8)                 | 6 (0.2)                                  | 155 (2.5)                            |
| <b>South-East Region</b>         |                           |                                          |                                      |
| Inland Counties                  | 525 (5.9)                 | 108 (4)                                  | 417 (6.7)                            |
| Imperial County                  | 293 (3.3)                 | 8 (0.3)                                  | 285 (4.6)                            |

|                        |                          |            |           |
|------------------------|--------------------------|------------|-----------|
| Riverside County       | 549 (6.2)                | 220 (8.2)  | 329 (5.3) |
| San Diego County       | 669 (7.5)                | 75 (2.8)   | 594 (9.6) |
|                        | <b>South-West Region</b> |            |           |
| Los Angeles County     | 903 (10.2)               | 760 (28.4) | 143 (2.3) |
| Orange County          | 326 (3.7)                | 107 (4)    | 219 (3.5) |
| San Luis Obispo County | 165 (1.9)                | 145 (5.4)  | 20 (0.3)  |
| Santa Barbara County   | 68 (0.8)                 | 2 (0.1)    | 66 (1.1)  |
| Ventura County         | 89 (1)                   | 53 (2)     | 36 (0.6)  |

---

**Supplemental Digital Content 4. Figure 1.** Annual sub-optimal re-triages of Seriously Injured Patient in California from 2009-2019 in each local emergency medical services agencies (LEMSA) segregated by regional trauma coordination center (RTCC)

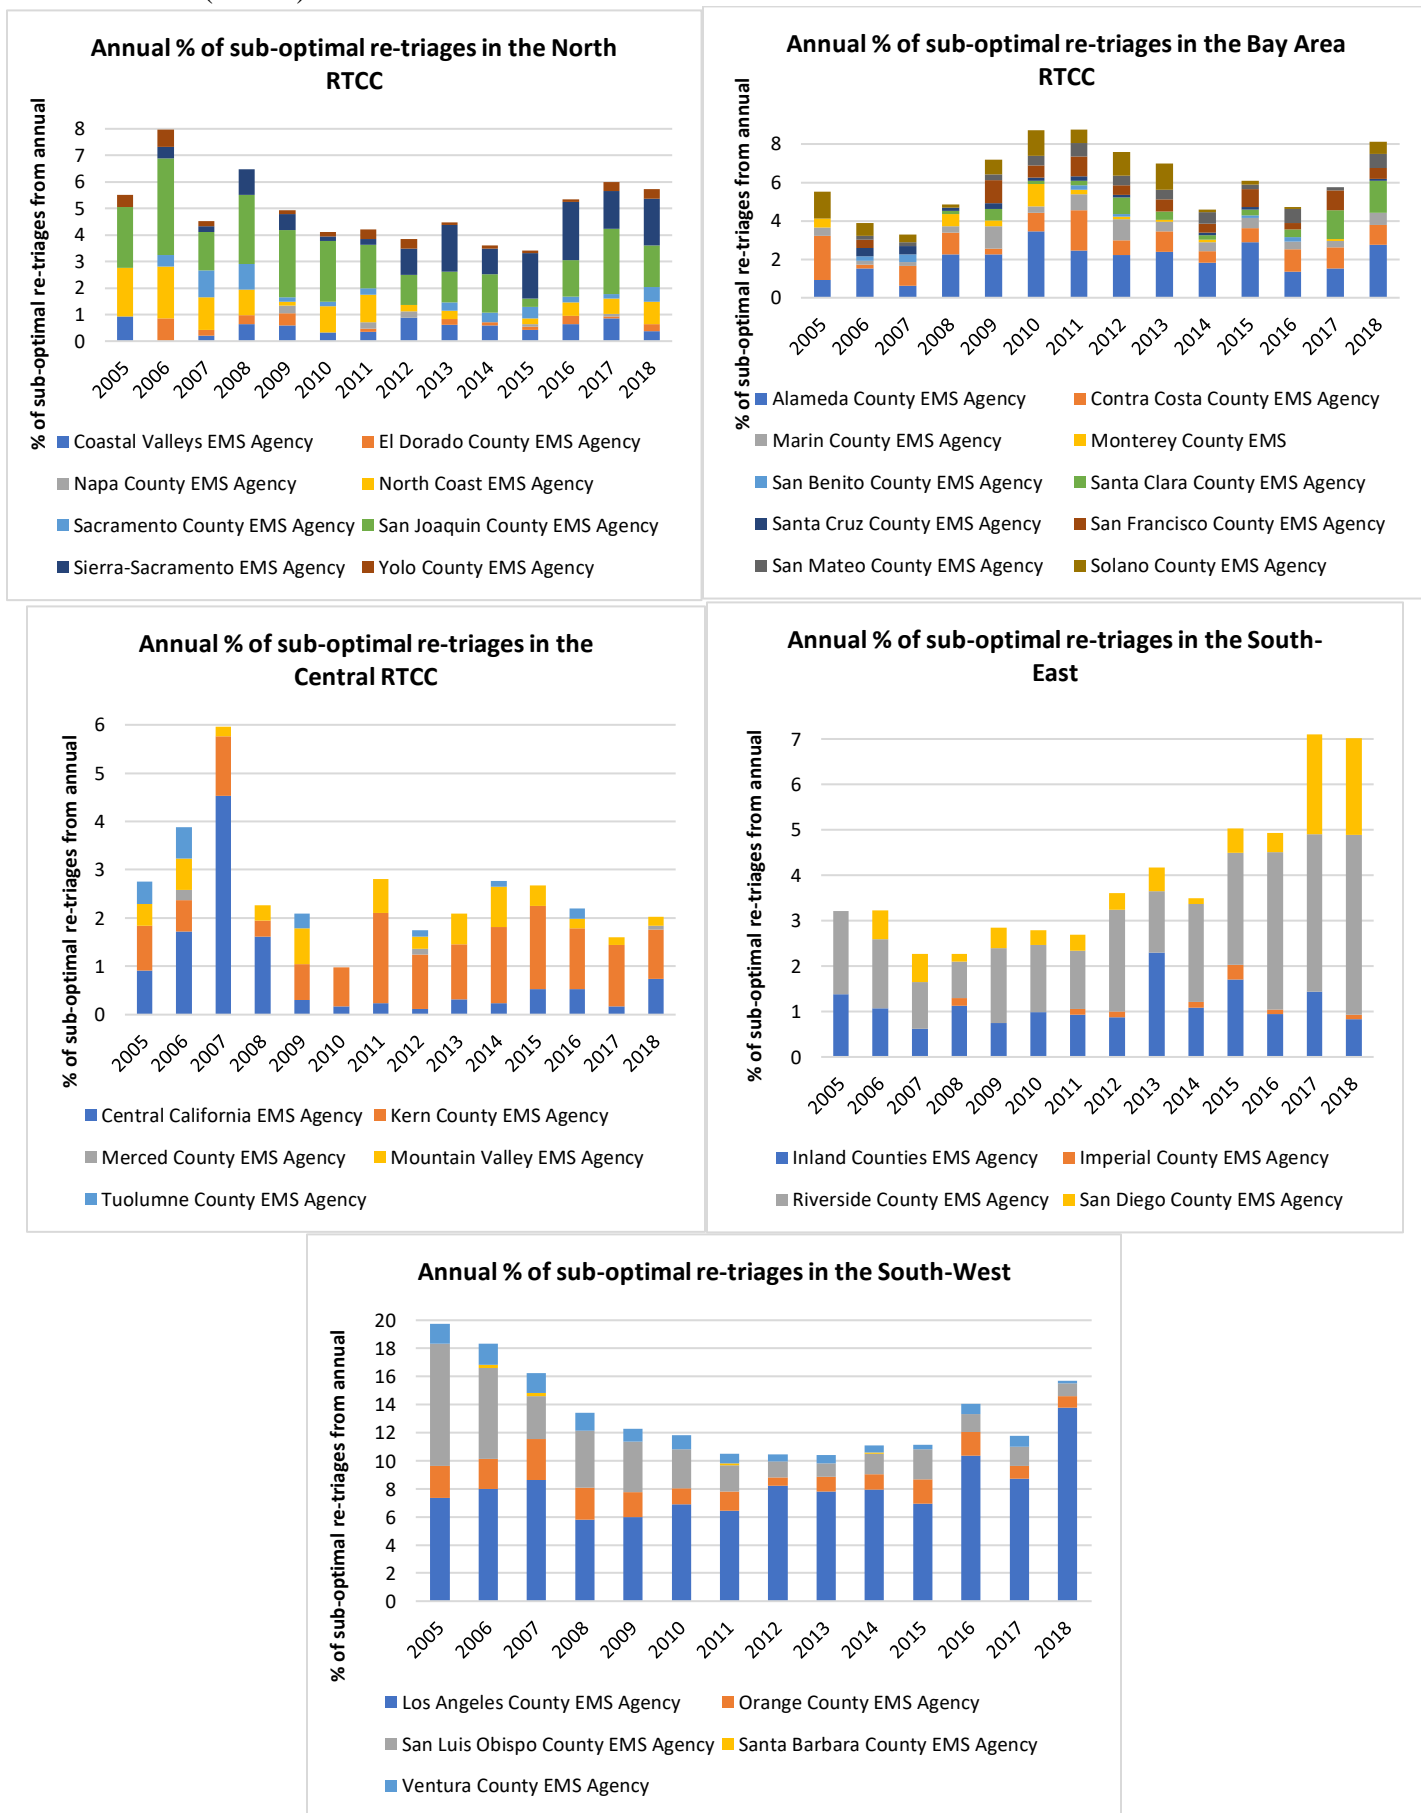

**Supplemental Digital Content 5. Table 4.** Capacity and demand of trauma care by RTCC.

| <b>RTCC</b> | <b>The total population during 2009-2018, Average <math>\pm</math> SD</b> | <b>The annual average number of Level I/II trauma centers</b> | <b>The annual average number of Level III/IV &amp; non-trauma</b> | <b>Level I/II trauma centers per 1,000,000 residents</b> | <b>Level I/II trauma centers per 100 Level III/IV &amp; non-trauma</b> |
|-------------|---------------------------------------------------------------------------|---------------------------------------------------------------|-------------------------------------------------------------------|----------------------------------------------------------|------------------------------------------------------------------------|
| North       | 4,787,666 $\pm$ 110,911                                                   | 6.0                                                           | 85.5                                                              | 1.25                                                     | 7.0                                                                    |
| Bay Area    | 7,558,614 $\pm$ 247,741                                                   | 6.4                                                           | 85.3                                                              | 0.85                                                     | 7.5                                                                    |
| Central     | 3,541,876 $\pm$ 93,750                                                    | 4.0                                                           | 50.6                                                              | 1.13                                                     | 7.9                                                                    |
| South-East  | 7,793,012 $\pm$ 241,303                                                   | 8.8                                                           | 71.8                                                              | 1.13                                                     | 12.3                                                                   |
| South-West  | 14,708,537 $\pm$ 290,637                                                  | 12.1                                                          | 162.6                                                             | 0.82                                                     | 7.4                                                                    |



**Supplemental Digital Content 6. Table 5.** The length of stay and discharge disposition in receiving center from sub-optimal versus optimal re-triaged seriously injured patients in California 2009-2018.

| Re-triage   | Total N | Length of stay, days             |                              |
|-------------|---------|----------------------------------|------------------------------|
|             |         | Average $\pm$ Standard Deviation | Median (Interquartile Range) |
| Sub-optimal | 2677    | 11.2 $\pm$ 15.3                  | 4 (1-13.5)                   |
| Optimal     | 6205    | 16.2 $\pm$ 26.9                  | 4 (1-15.5)                   |

**Supplemental Digital Content 6. Table 6.** Unadjusted rates of discharge disposition from sub-optimal versus optimal re-triaged seriously injured patients in California 2009-2018.

| Re-triage          | Total N    | Discharge disposition n(%) |           |                                |                 |
|--------------------|------------|----------------------------|-----------|--------------------------------|-----------------|
|                    |            | Home                       | Died      | Short-term Acute Care Hospital | Post-acute care |
| <b>Sub-optimal</b> | 2680 (100) | 1650 (61.6)                | 164 (6.1) | 141 (5.3)                      | 725 (27.1)      |
| <b>Optimal</b>     | 6202 (100) | 3794 (61.2)                | 410 (6.6) | 217 (3.5)                      | 1781 (28.7)     |

**Supplemental Digital Content 6. Table 7.** Odds ratio estimated (using logistic regression) for expected discharge disposition outcome after sub-optimally re-triaged versus optimally re-triaged patients

| Discharge Disposition of Re-triaged | Odds Ratio  | Std Err | p-value           | [95% Conf. Interval] |
|-------------------------------------|-------------|---------|-------------------|----------------------|
| Home*                               | 1.02        | 0.05    | 0.727             | [0.93 - 1.12]        |
| Died*                               | 0.92        | 0.09    | 0.387             | [0.76 - 1.11]        |
| Short-term Acute Care Hospital*     | <b>1.53</b> | 0.17    | <b>&lt;0.0001</b> | [1.23 - 1.90]        |
| Post-acute care*                    | 0.92        | 0.05    | 0.110             | [0.83- 1.02]         |

\*See **Supplemental Digital Content 6 Table 8** for the definition of the category.

**Supplemental Digital Content 6. Table 8.** Value sets used to group discharge disposition (disp) variable into categories.

| Value sets for the period 2009-2014 | Value sets for the period 2015-2018                                                                                                         |
|-------------------------------------|---------------------------------------------------------------------------------------------------------------------------------------------|
|                                     | <b>Home</b>                                                                                                                                 |
| 12 = Home Health Service            | 01 = Discharged to home or self-care (routine discharge)                                                                                    |
| 01 = Routine (home)                 | 06 = Discharged/transferred to home under the care of an organized home health service organization in anticipation of covered skilled care |
| 08 = Residential Care Facility      | 50 = Hospice - Home                                                                                                                         |
|                                     | 51 = Hospice - Medical facility (certified) providing hospice level of care                                                                 |
|                                     | 81 = Discharged to home or self-care with a planned acute care hospital inpatient readmission                                               |
|                                     | 65 = Discharged/transferred to a psychiatric hospital or psychiatric distinct part unit of a hospital                                       |

10 = Left Against Medical Advice  
09 = Prison/Jail

07 = Left against medical advice or discontinued care  
21 = Discharged/transferred to court/law enforcement  
43 = Discharged/transferred to a federal healthcare facility

---

**Died**

11 = Died

20 = Expired

---

**Short-term Acue Hospital**

02 = Acute Care within the admitting hospital  
05 = Acute Care at another hospital

02 = Discharged/transferred to a short-term general hospital for inpatient care  
82 = Discharged/transferred to a short-term general hospital for inpatient care with a planned acute care hospital inpatient readmission

---

**Post-acute care**

06 = Other Care (not SN/IC) at another hospital  
03 = Other Care within the admitting hospital

90 = Discharged/transferred to an inpatient rehabilitation facility (IRF) including rehabilitation distinct part unit of a hospital with a planned acute care hospital inpatient readmission  
70 = Discharged/transferred to another type of health care institution not defined elsewhere in this code list  
04 = Discharged/transferred to a facility that provides custodial or supportive care (includes Intermediate Care Facility)  
05 = Discharged/transferred to a designated cancer center or children's hospital  
62 = Discharged/transferred to an inpatient rehabilitation facility (IRF) including a rehabilitation distinct part unit of a hospital  
63 = Discharged/transferred to a Medicare-certified long-term care hospital (LTCH)  
66 = Discharged/transferred to a Critical Access Hospital (CAH)  
61 = Discharged/transferred to a hospital-based Medicare-approved swing bed  
83 = Discharged/transferred to a skilled nursing facility (SNF) with Medicare certification with a planned acute care hospital inpatient readmission  
03 = Discharged/transferred to a skilled nursing facility (SNF) with Medicare certification in anticipation of skilled care  
64 = Discharged/transferred to a nursing facility certified under Medicaid (Medi-Cal), but not certified under Medicare

---

07 = Skilled Nursing / Intermediate Care (SN/IC) at another facility  
04 = Skilled Nursing / Intermediate Care (SN/IC) within the admitting hospital

**Supplementary Digital Content 7. Table 9.** Re-admission after discharge from sub-optimal versus optimal re-triage destination among seriously injured patients in California 2009-2018.

| <b>Survivor Re-admission</b> | <b>total N</b> | <b>Re-admission, n (%)</b> |                     |                     |
|------------------------------|----------------|----------------------------|---------------------|---------------------|
|                              |                | <b>&lt;=10 days</b>        | <b>&lt;=30 days</b> | <b>&lt;=60 days</b> |
| Sub-optimal                  | 2584           | 168 (6.5 )                 | 273 (10.6 )         | 326 (12.6 )         |
| Optimal                      | 5933           | 305 (5.1 )                 | 516 (8.7 )          | 615 (10.4 )         |

**Supplementary Digital Content 7. Table 10.** Odds ratio estimated (using logistic regression) for re-admission after discharge from sub-optimal versus optimal re-triage destination among seriously injured patients in California 2009-2018.

| <b>Re-admission</b> | <b>Odds Ratio</b> | <b>Std Err</b> | <b>p-value</b> | <b>[95% Conf. Interval]</b> |
|---------------------|-------------------|----------------|----------------|-----------------------------|
| ≤10 days            | 1.28              | 0.13           | 0.012          | [1.06 - 1.56]               |
| ≤30 days            | 1.24              | 0.10           | 0.006          | [1.06 – 1.45]               |
| ≤60 days            | 1.25              | 0.09           | 0.002          | [1.08 – 1.44]               |

**Supplementary Digital Content 8. Table 11.** Annual summary on severely injured patients listed as transferred but not subsequently found in a second hospital.

| <b>Year</b> | <b>Patients listed as transferred but not subsequently found in a second hospital</b> |
|-------------|---------------------------------------------------------------------------------------|
| 2009        | 202                                                                                   |
| 2010        | 205                                                                                   |
| 2011        | 233                                                                                   |
| 2012        | 236                                                                                   |
| 2013        | 236                                                                                   |
| 2014        | 249                                                                                   |
| 2015        | 216                                                                                   |
| 2016        | 153                                                                                   |
| 2017        | 390                                                                                   |
| 2018        | 387                                                                                   |
